# Supplementary material for: Scanorama: integrating large and diverse single-cell transcriptomic datasets
Source: Springer Nature journal article supplement (doi:10.1038/s41596-024-00991-3), 2024-06-06
Supplement: MOESM1 [file 41596_2024_991_MOESM1_ESM6.pdf]

# Scanorama: integrating large and diverse single-cell transcriptomic datasets

In the format provided by the  
authors and unedited

**a**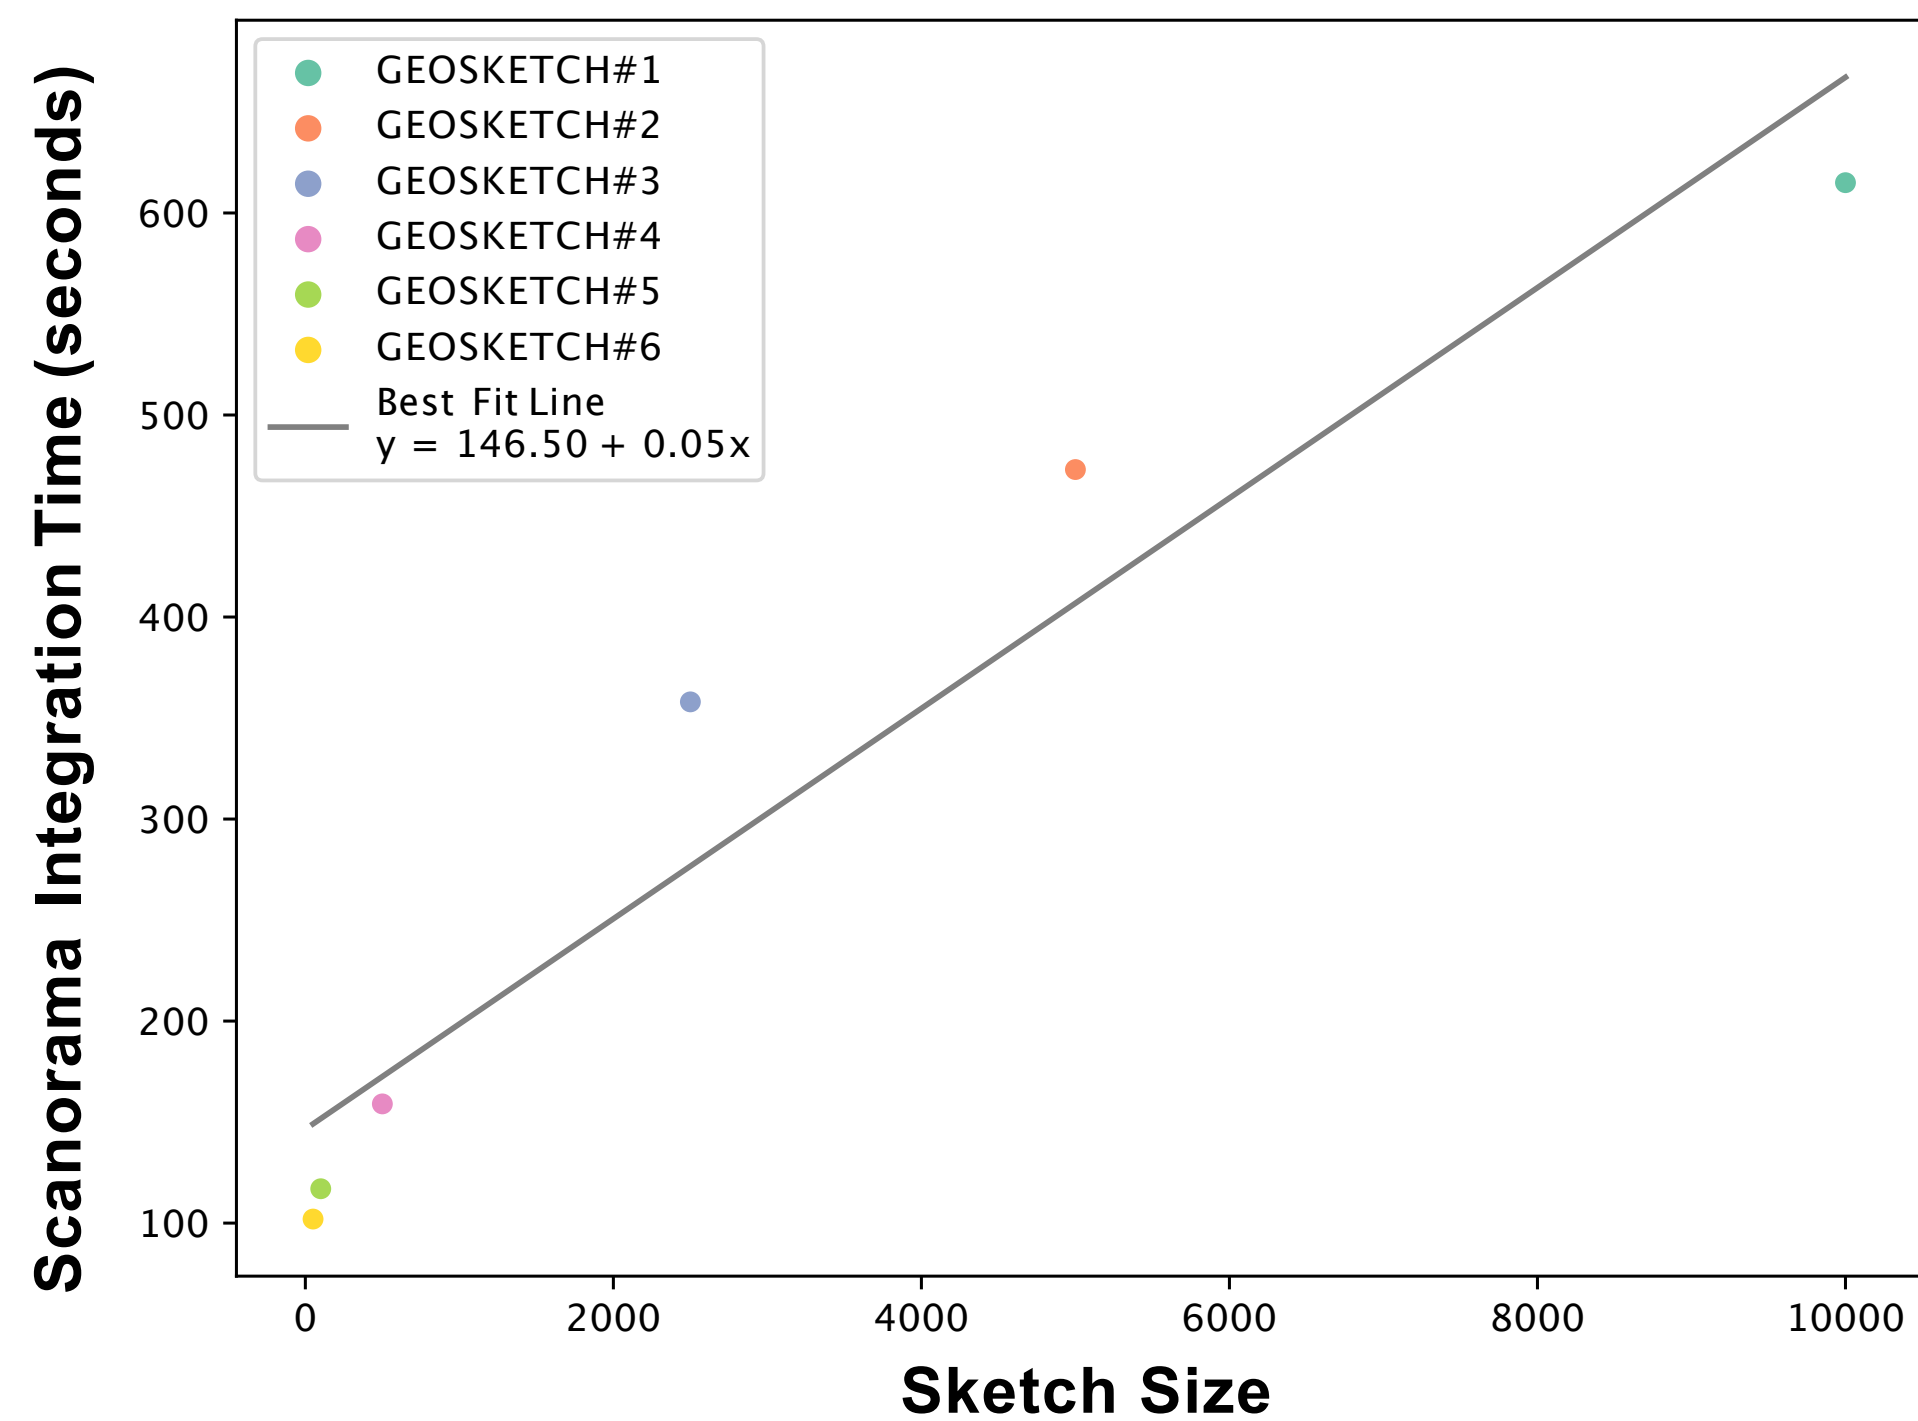**b**

| Geosketch | Method       | Bio conservation |            |            |                  |       | Batch correction |       |      |                               |      | Aggregate score  |                  |       |
|-----------|--------------|------------------|------------|------------|------------------|-------|------------------|-------|------|-------------------------------|------|------------------|------------------|-------|
|           |              | Isolated labels  | KMeans NMI | KMeans ARI | Silhouette label | cLISI | Silhouette batch | iLISI | KBET | Graph connectivity comparison | PCR  | Batch correction | Bio conservation | Total |
| NA        | Scanorama    | 0.68             | 0.72       | 0.52       | 0.60             | 1.00  | 0.77             | 0.02  | 0.26 | 0.62                          | 0.07 | 0.35             | 0.70             | 0.56  |
| 10000     | GEOSKETCH #1 | 0.67             | 0.70       | 0.47       | 0.60             | 1.00  | 0.79             | 0.02  | 0.26 | 0.62                          | 0.09 | 0.36             | 0.69             | 0.56  |
| 5000      | GEOSKETCH #2 | 0.67             | 0.70       | 0.47       | 0.60             | 1.00  | 0.79             | 0.02  | 0.25 | 0.61                          | 0.09 | 0.36             | 0.69             | 0.55  |
| 2500      | GEOSKETCH #3 | 0.67             | 0.70       | 0.47       | 0.60             | 1.00  | 0.79             | 0.02  | 0.25 | 0.62                          | 0.09 | 0.36             | 0.69             | 0.55  |
| 500       | GEOSKETCH #4 | 0.57             | 0.67       | 0.44       | 0.58             | 1.00  | 0.86             | 0.02  | 0.24 | 0.61                          | 0.13 | 0.37             | 0.65             | 0.54  |
| NA        | Unintegrated | 0.72             | 0.73       | 0.51       | 0.63             | 1.00  | 0.58             | 0.01  | 0.10 | 0.65                          | 0.00 | 0.27             | 0.72             | 0.54  |
| 100       | GEOSKETCH #5 | 0.64             | 0.69       | 0.47       | 0.55             | 1.00  | 0.80             | 0.02  | 0.25 | 0.61                          | 0.02 | 0.34             | 0.67             | 0.54  |
| 50        | GEOSKETCH #6 | 0.64             | 0.68       | 0.45       | 0.55             | 1.00  | 0.80             | 0.02  | 0.22 | 0.61                          | 0.03 | 0.33             | 0.66             | 0.53  |

**Supplementary Figure 1. Overview of top and bottom ranked sketch parameter adjustments by aggregate score for the large dataset 1 example.** (a) Scatterplot of sketch size (ranging from 50 to 10,000) and Scanorama integration time in seconds. (b) Single-cell integration benchmarking (Scib) metrics was applied to assess the quality of the Scanorama-integrated 26 single-cell datasets with a range of sketching subsamples. Metrics are divided into bio conservation and batch correction categories. Aggregate scores are computed using a 40/60 weighted mean of the category scores as done by Luecken et al.<sup>3</sup> The color code represents the range of values for each metric. Circles accompanying metric values are color-coded using a Purple-Green colormap (PRGn). The colormap spans a range of 2.5 standard deviations from the mean, where higher values are depicted in shades of green, and lower values in shades of purple. For the "Total" aggregate score, represented by bars in the figure, a distinct color scheme is applied. The color of the bars is determined by the Yellow-Green-Blue color map (YIGnBu). This color code reflects a weighted combination of "Batch correction" and "Bio conservation" scores. Higher "Total" scores are depicted shades of blue, while lower scores are in shades of yellow-green.

|     |       |        |                | Bio conservation |            |            |                  |       | Batch correction |       |      |                               |      | Aggregate score  |                  |       |
|-----|-------|--------|----------------|------------------|------------|------------|------------------|-------|------------------|-------|------|-------------------------------|------|------------------|------------------|-------|
| Knn | Sigma | Dimred | Method         | Isolated labels  | KMeans NMI | KMeans ARI | Silhouette label | cLISI | Silhouette batch | iLISI | KBET | Graph connectivity comparison | PCR  | Batch correction | Bio conservation | Total |
| 20  | 1     | 100    | Scanorama_sig  | 0.68             | 0.72       | 0.51       | 0.60             | 1.00  | 0.77             | 0.02  | 0.26 | 0.62                          | 0.09 | <div></div> 0.35 | 0.70             | 0.56  |
| 20  | 5     | 100    | Scanorama_sig2 | 0.68             | 0.72       | 0.51       | 0.60             | 1.00  | 0.77             | 0.02  | 0.26 | 0.62                          | 0.08 | <div></div> 0.35 | 0.70             | 0.56  |
| 20  | 15    | 100    | Scanorama      | 0.68             | 0.72       | 0.52       | 0.60             | 1.00  | 0.77             | 0.02  | 0.26 | 0.62                          | 0.07 | <div></div> 0.35 | 0.70             | 0.56  |
| 30  | 15    | 100    | Scanorama_knn3 | 0.67             | 0.69       | 0.50       | 0.60             | 1.00  | 0.79             | 0.02  | 0.26 | 0.62                          | 0.07 | <div></div> 0.35 | 0.69             | 0.56  |
| 20  | 50    | 100    | Scanorama_sig3 | 0.68             | 0.72       | 0.53       | 0.60             | 1.00  | 0.76             | 0.03  | 0.26 | 0.59                          | 0.03 | <div></div> 0.33 | 0.70             | 0.56  |
| 40  | 15    | 100    | Scanorama_knn4 | 0.68             | 0.69       | 0.50       | 0.60             | 1.00  | 0.78             | 0.02  | 0.26 | 0.62                          | 0.05 | <div></div> 0.35 | 0.69             | 0.55  |
| 50  | 15    | 100    | Scanorama_knn5 | 0.68             | 0.69       | 0.50       | 0.60             | 1.00  | 0.79             | 0.02  | 0.27 | 0.61                          | 0.05 | <div></div> 0.35 | 0.69             | 0.55  |
| 20  | 15    | 50     | Scanorama_dim2 | 0.70             | 0.71       | 0.50       | 0.62             | 1.00  | 0.70             | 0.02  | 0.23 | 0.69                          | 0.00 | <div></div> 0.33 | 0.70             | 0.55  |
| 10  | 15    | 100    | Scanorama_knn2 | 0.68             | 0.72       | 0.48       | 0.60             | 1.00  | 0.75             | 0.02  | 0.25 | 0.60                          | 0.07 | <div></div> 0.34 | 0.70             | 0.55  |
| 5   | 15    | 100    | Scanorama_knn  | 0.68             | 0.72       | 0.53       | 0.60             | 1.00  | 0.69             | 0.02  | 0.14 | 0.56                          | 0.08 | <div></div> 0.30 | 0.71             | 0.54  |
| 20  | 15    | 10     | Scanorama_dim  | 0.74             | 0.68       | 0.48       | 0.63             | 0.99  | 0.55             | 0.02  | 0.20 | 0.69                          | 0.00 | <div></div> 0.29 | 0.70             | 0.54  |
| NA  | NA    | NA     | Unintegrated   | 0.72             | 0.73       | 0.51       | 0.63             | 1.00  | 0.58             | 0.01  | 0.10 | 0.65                          | 0.00 | <div></div> 0.27 | 0.72             | 0.54  |
| 20  | 100   | 100    | Scanorama_sig4 | 0.67             | 0.73       | 0.50       | 0.60             | 1.00  | 0.75             | 0.03  | 0.23 | 0.46                          | 0.01 | <div></div> 0.29 | 0.70             | 0.54  |
| 20  | 15    | 1000   | Scanorama_dim4 | 0.61             | 0.76       | 0.52       | 0.54             | 1.00  | 0.88             | 0.03  | 0.14 | 0.08                          | 0.44 | <div></div> 0.31 | 0.68             | 0.54  |
| 20  | 15    | 500    | Scanorama_dim3 | 0.63             | 0.73       | 0.49       | 0.56             | 1.00  | 0.84             | 0.03  | 0.19 | 0.17                          | 0.33 | <div></div> 0.31 | 0.68             | 0.53  |

**Supplementary Figure 2. Overview of top and bottom ranked parameter adjustments by aggregate score for the large dataset 1 example.**

Single-cell integration benchmarking (Scib) metrics was applied to assess the quality of the Scanorama-integrated 26 single-cell datasets from 9 different technologies. Metrics are divided into bio conservation and batch correction categories. Aggregate scores are computed using a 40/60 weighted mean of the category scores as done by Luecken et al.<sup>3</sup> The color code represents the range of values for each metric. Circles accompanying metric values are color-coded using a Purple-Green colormap (PRGn). The colormap spans a range of 2.5 standard deviations from the mean, where higher values are depicted in shades of green, and lower values in shades of purple. For the "Total" aggregate score, represented by bars in the figure, a distinct color scheme is applied. The color of the bars is determined by the Yellow-Green-Blue color map (YIGnBu). This color code reflects a weighted combination of "Batch correction" and "Bio conservation" scores. Higher "Total" scores are depicted shades of blue, while lower scores are in shades of yellow-green.



# Benchmarking Small Dataset

| Method       | Bio conservation |            |            |                  |       | Batch correction |       |      |                               |      | Aggregate score  |                  |       |
|--------------|------------------|------------|------------|------------------|-------|------------------|-------|------|-------------------------------|------|------------------|------------------|-------|
|              | Isolated labels  | KMeans NMI | KMeans ARI | Silhouette label | cLISI | Silhouette batch | iLISI | KBET | Graph connectivity comparison | PCR  | Batch correction | Bio conservation | Total |
| Harmony      | 0.78             | 0.96       | 0.98       | 0.78             | 1.00  | 0.98             | 0.36  | 0.73 | 0.92                          | 0.02 | 0.60             | 0.90             | 0.78  |
| scANVI       | 0.94             | 0.98       | 0.99       | 0.93             | 1.00  | 0.82             | 0.07  | 0.32 | 0.99                          | 0.00 | 0.44             | 0.97             | 0.76  |
| Scanorama    | 0.73             | 0.96       | 0.98       | 0.73             | 1.00  | 0.97             | 0.35  | 0.60 | 0.69                          | 0.19 | 0.56             | 0.88             | 0.75  |
| Unintegrated | 0.77             | 0.96       | 0.98       | 0.77             | 1.00  | 0.89             | 0.05  | 0.31 | 0.92                          | 0.00 | 0.44             | 0.90             | 0.71  |
| scVI         | 0.58             | 0.18       | 0.11       | 0.57             | 0.97  | 0.72             | 0.13  | 0.10 | 0.93                          | 0.92 | 0.56             | 0.48             | 0.51  |

# Benchmarking Large Dataset

| Method       | Bio conservation |            |            |                  |       | Batch correction |       |      |                               |      | Aggregate score  |                  |       |
|--------------|------------------|------------|------------|------------------|-------|------------------|-------|------|-------------------------------|------|------------------|------------------|-------|
|              | Isolated labels  | KMeans NMI | KMeans ARI | Silhouette label | cLISI | Silhouette batch | iLISI | KBET | Graph connectivity comparison | PCR  | Batch correction | Bio conservation | Total |
| scANVI       | 0.84             | 0.84       | 0.68       | 0.76             | 1.00  | 0.77             | 0.01  | 0.26 | 0.90                          | 0.30 | 0.45             | 0.82             | 0.67  |
| Scanorama    | 0.68             | 0.72       | 0.52       | 0.60             | 1.00  | 0.77             | 0.02  | 0.26 | 0.62                          | 0.07 | 0.35             | 0.70             | 0.56  |
| Unintegrated | 0.72             | 0.73       | 0.51       | 0.63             | 1.00  | 0.58             | 0.01  | 0.10 | 0.65                          | 0.00 | 0.27             | 0.72             | 0.54  |
| Harmony      | 0.47             | 0.48       | 0.20       | 0.47             | 0.98  | 0.83             | 0.04  | 0.21 | 0.63                          | 0.11 | 0.36             | 0.52             | 0.46  |
| scVI         | 0.28             | 0.34       | 0.15       | 0.35             | 0.99  | 0.55             | 0.02  | 0.21 | 0.64                          | 0.97 | 0.48             | 0.42             | 0.44  |

## Supplementary Figure 3. Benchmarking results for the small and large dataset.

Single-cell integration benchmarking (Scib) metrics was applied to assess the quality of the superiority of Scanorama integration method against other integration methods, scANVI, scVI and Harmony. Metrics are divided into bio conservation and batch correction categories. Aggregate scores are computed using a 40/60 weighted mean of the category scores as done by Luecken et al.<sup>3</sup> The color code represents the range of values for each metric. Circles accompanying metric values are color-coded using a Purple-Green colormap (PRGn). The colormap spans a range of 2.5 standard deviations from the mean, where higher values are depicted in shades of green, and lower values in shades of purple. For the "Total" aggregate score, represented by bars in the figure, a distinct color scheme is applied. The color of the bars is determined by the Yellow-Green-Blue color map (YIGnBu). This color code reflects a weighted combination of "Batch correction" and "Bio conservation" scores. Higher "Total" scores are depicted shades of blue, while lower scores are in shades of yellow-green.
